# Supplementary material for: Cyclopentathiadiazines, new heterocyclic materials from cyclic enaminonitriles
Source: Royal Society of Chemistry journal article supplement (doi:10.1039/b412632g), 2004-11-30
Supplement: b412632g-a.pdf [file b412632g-a.pdf]

## Cyclopentathiadiazines, new heterocyclic materials from cyclic enaminonitriles.

Sonia Macho,<sup>a</sup> Daniel Miguel,<sup>b</sup> Ana G. Neo,<sup>a</sup> Teresa Rodríguez,<sup>a</sup> and Tomás Torroba<sup>\*a</sup>

<sup>a</sup> Departamento de Química, Facultad de Ciencias, Universidad de Burgos, 09001 Burgos, Spain.  
Fax: 34 947 258087; Tel: 34 947 258088; E-mail: ttorroba@ubu.es

<sup>b</sup> Departamento de Departamento de Química Física y Química Inorgánica, Facultad de Ciencias, Universidad de Valladolid, 47005 Valladolid, Spain; E-mail: dmsj@qi.uva.es

<sup>1</sup>H- and <sup>13</sup>C-NMR spectra of compounds **4** and **6**.

<sup>1</sup>H-NMR spectrum of compound **4**:

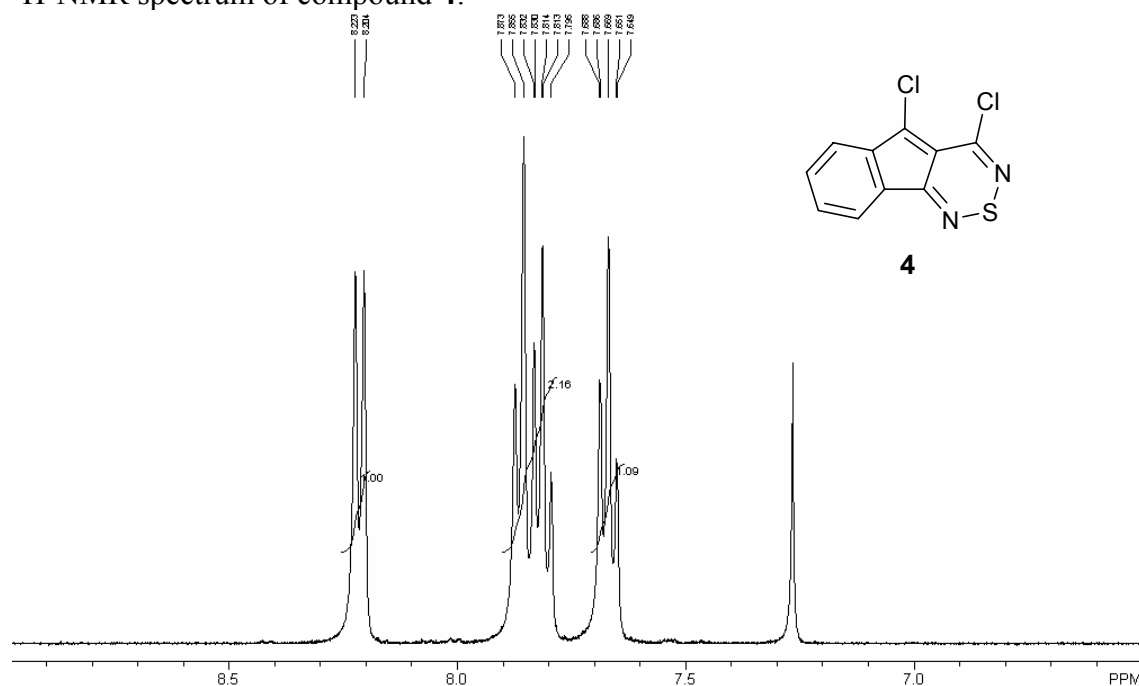

<sup>1</sup>H-NMR spectrum of compound **6**:

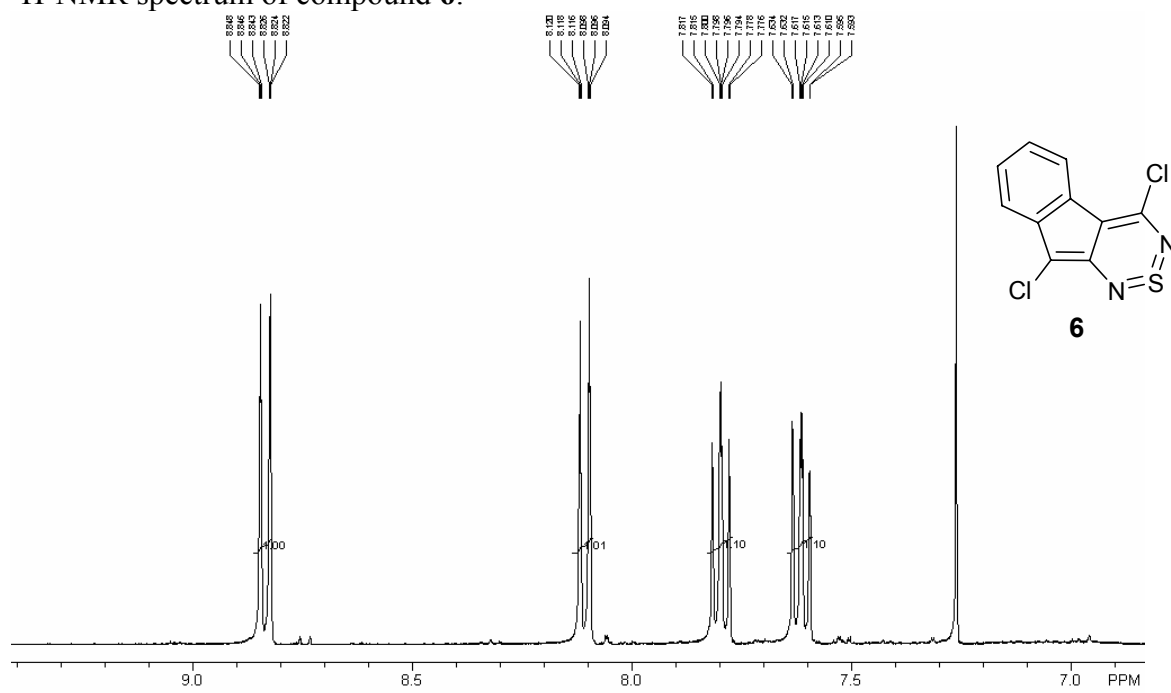

<sup>13</sup>C-NMR spectrum of compound **6**:

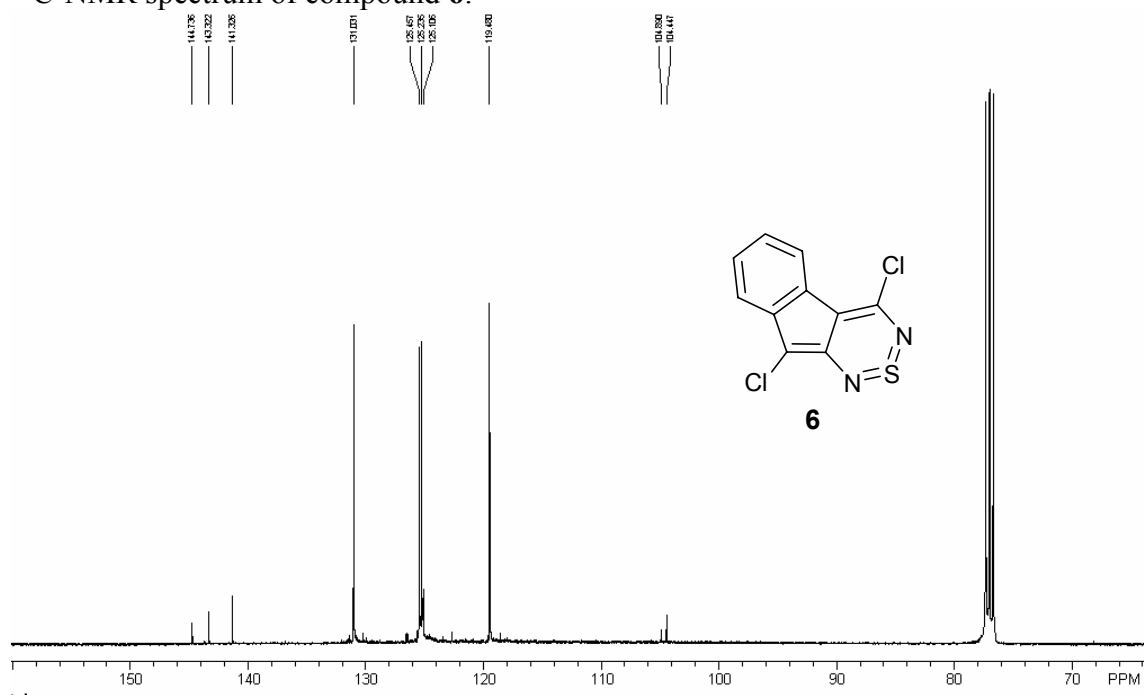

In the  $^1\text{H}$ -NMR spectrum of compound **6**, one proton appears in a very low field. To explain this behavior we have performed *ab-initio* calculations (Unrestricted Hartree-Fock, 6-31G\*) to get insight into the most plausible geometry of structure **6**. The structure found showed that the distance between the chlorine atom in position 8 and the next hydrogen atom in position 7 is 2.740 Å. The van der Waals spheres of both atoms interpenetrate themselves in the spacefill representation of structure **6**. It is therefore expected that the hydrogen atom should appear in the  $^1\text{H}$ -NMR spectrum at a lower field than the rest of hydrogen atoms in the molecule, in fact this hydrogen signal appears at  $\delta$  8.8. This feature constitutes a confirmation of the proposed structure of **6**.

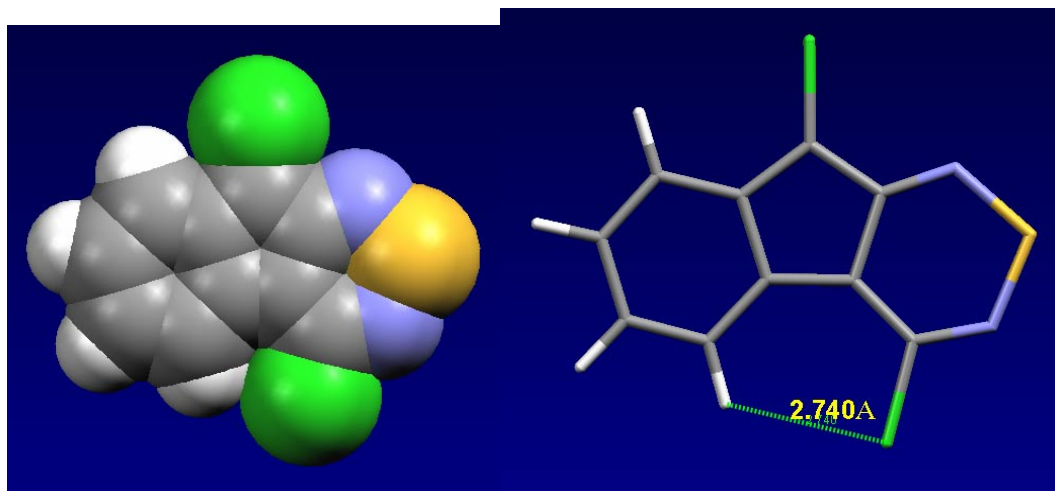

Spacefill and stick representations of the calculated structure of compound **6** showing the closest distance between a chlorine atom and a near hydrogen atom.
