# Supplementary material for: Cyclopentathiadiazines, new heterocyclic materials from cyclic enaminonitriles
Source: Royal Society of Chemistry journal article supplement (doi:10.1039/b412632g), 2004-11-30
Supplement: b412632g-d.pdf [file b412632g-d.pdf]

# Supplementary Material (ESI) for Chemical Communications  
# This journal is © The Royal Society of Chemistry 2004

## **Cyclopentathiadiazines, new heterocyclic materials from cyclic enaminonitriles.**

**Sonia Macho,<sup>a</sup> Daniel Miguel,<sup>b</sup> Ana G. Neo,<sup>a</sup> Teresa Rodríguez,<sup>a</sup> and Tomás Torroba<sup>\*a</sup>**

<sup>a</sup> *Departamento de Química, Facultad de Ciencias, Universidad de Burgos, 09001 Burgos, Spain. Fax: 34 947 258087; Tel: 34 947 258088; E-mail: ttorroba@ubu.es*

<sup>b</sup> *Departamento de Departamento de Química Física y Química Inorgánica, Facultad de Ciencias, Universidad de Valladolid, 47005 Valladolid, Spain; E-mail: dmsj@qi.uva.es*

A comparison between UV spectra of compounds **4-5** and **7-8** and some rotational studies to show steric hindrance that prevents conjugation of morpholine nitrogen and thiadiazine ring in **5** and **8**.

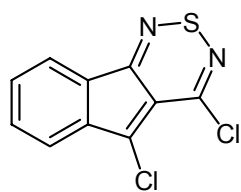

**4** (SM100)

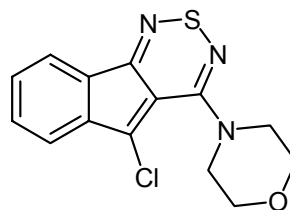

**5** (SM103-2)

$6,54 \times 10^{-5}$  M in  $\text{CH}_2\text{Cl}_2$

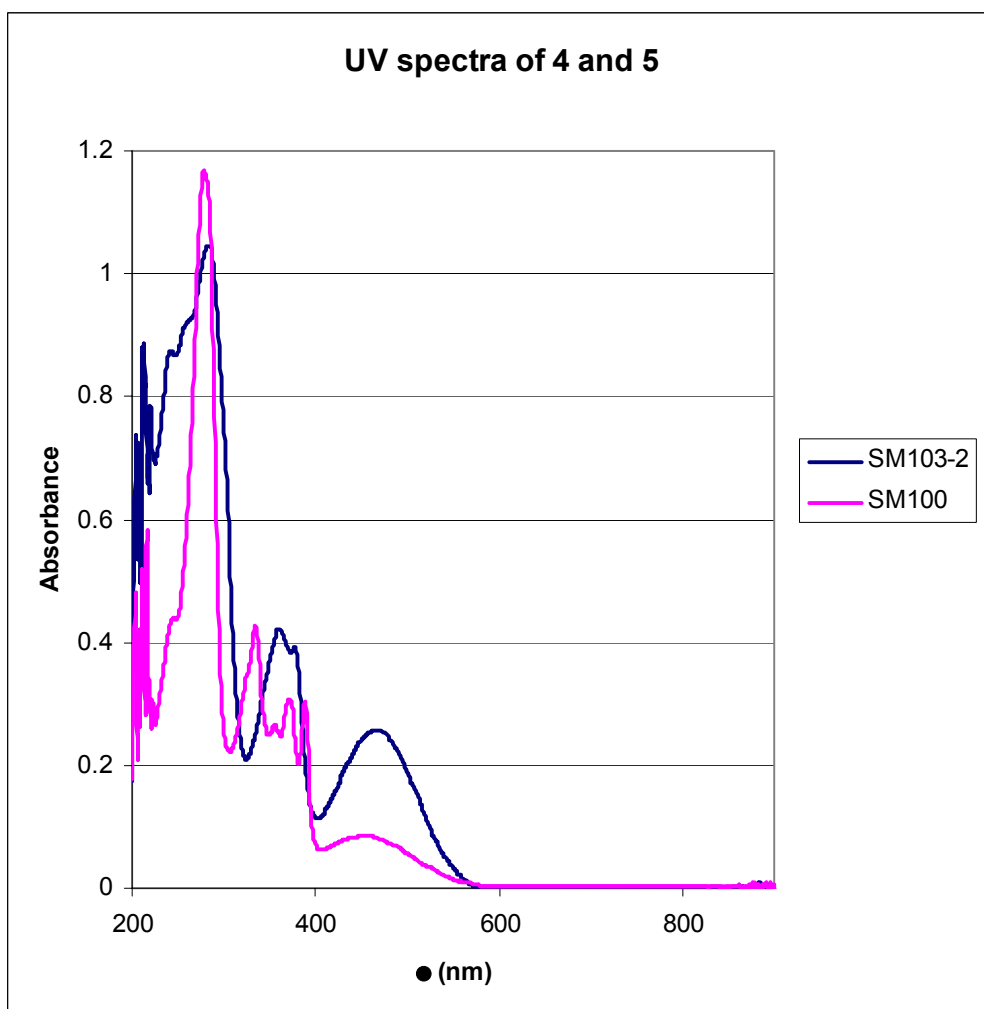

**4:** ( $\lambda_{\text{max}} = 453$  nm,  $\epsilon = 1809$  in  $\text{CH}_2\text{Cl}_2$ )

**5:** ( $\lambda_{\text{max}} = 469$  nm,  $\epsilon = 3917$  in  $\text{CH}_2\text{Cl}_2$ )

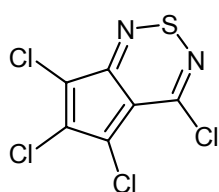

**7** (SM33-1)

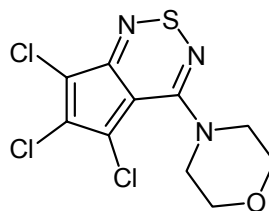

**8** (SM69-2)

$6,16 \times 10^{-5}$  M in  $\text{CH}_2\text{Cl}_2$

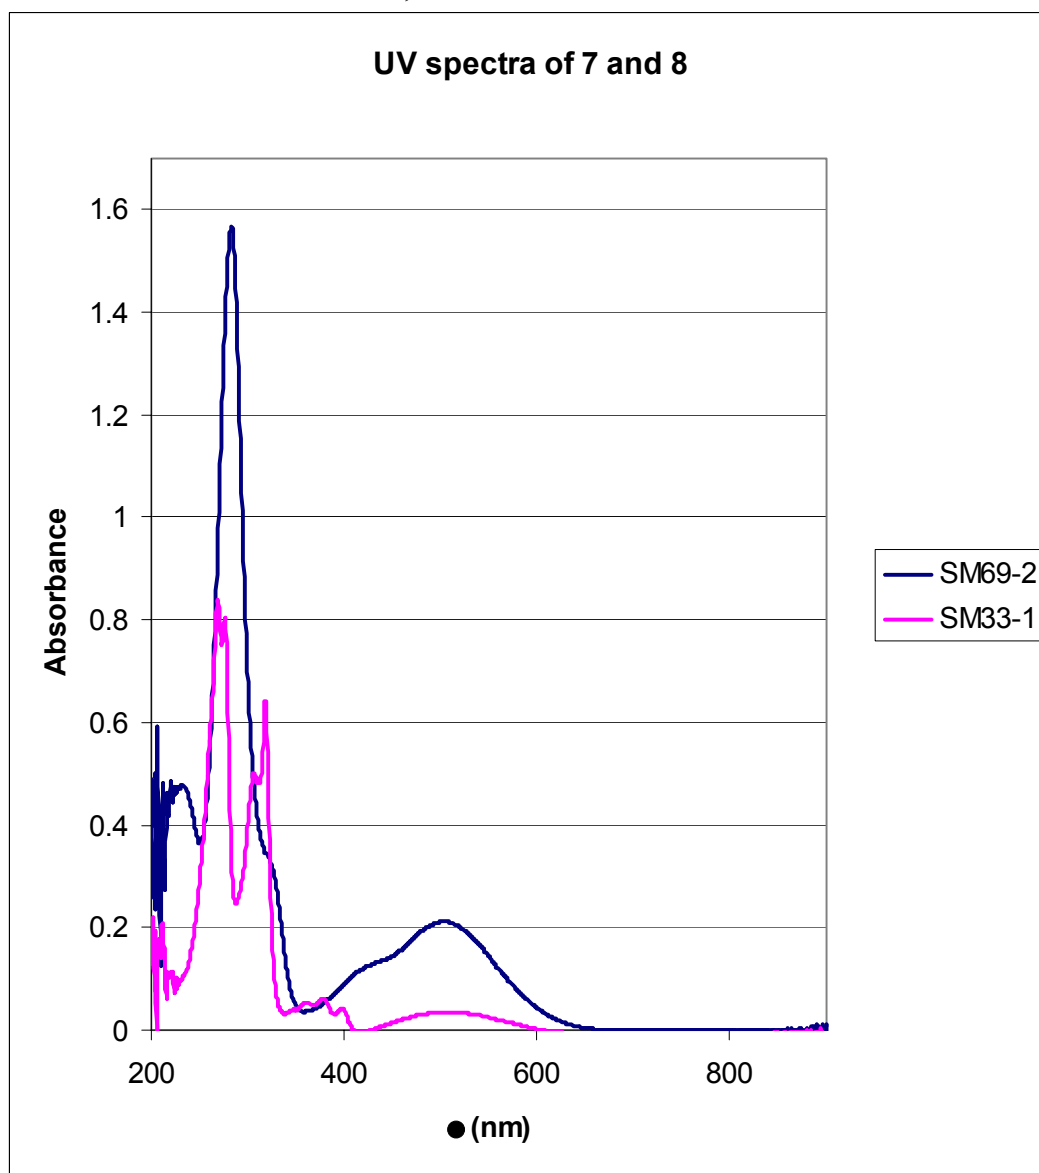

**7:** ( $\lambda_{\text{max}} = 504$  nm,  $\epsilon = 573$  in  $\text{CH}_2\text{Cl}_2$ )

**8:** ( $\lambda_{\text{max}} = 501$  nm,  $\epsilon = 3443$  in  $\text{CH}_2\text{Cl}_2$ )

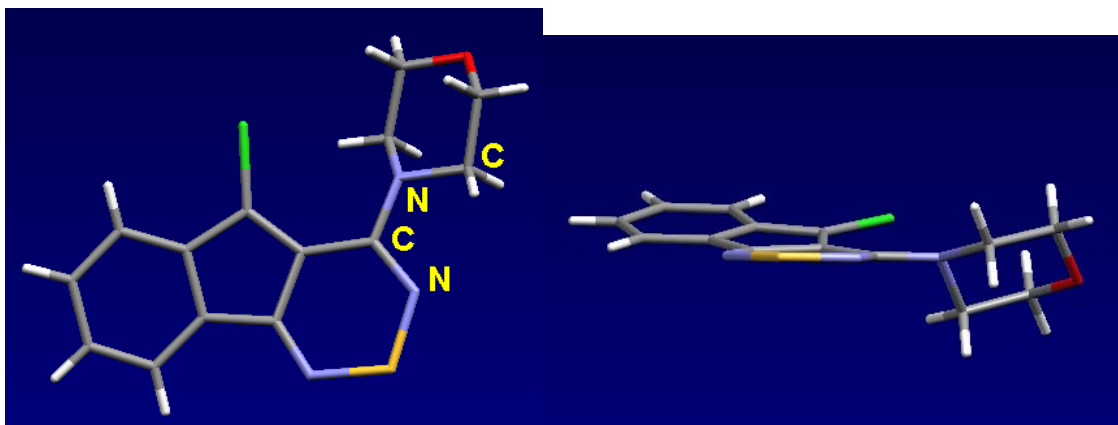

Two different views of the X-ray diffraction structure of compound **5** showing the relative position of the morpholine ring with respect to the thiadiazine ring. Dihedral angle N(thiadiazine)-C-N(morpholine)-C =  $-14.25^\circ$ .

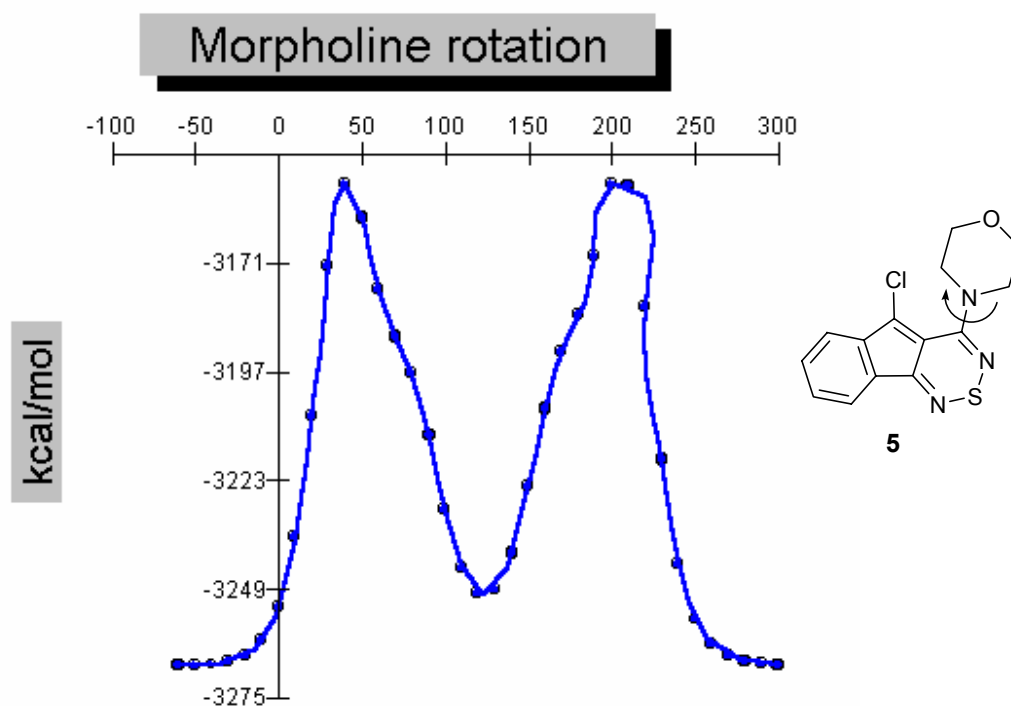

Plot of relative energies corresponding to rotation of the morpholine ring with respect to the thiadiazine ring. The two maxima correspond to dihedral angles of roughly 200 and  $37.5^\circ$  of the N(thiadiazine)-C-N(morpholine)-C dihedral angle as indicated in the first figure.

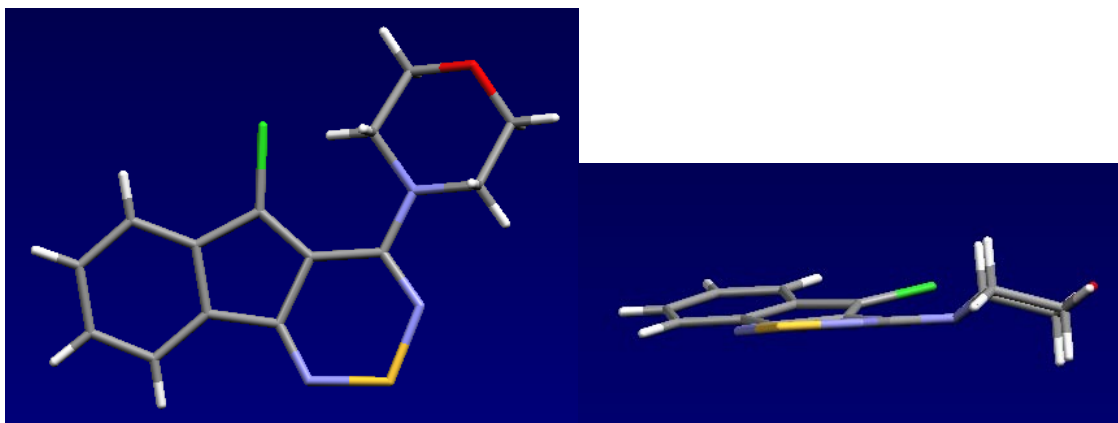

Two different views of the first maximum (dihedral angle 200 °) showing that the conjugation of the morpholine nitrogen lone pair and the thiadiazine ring is hindered by a strong interaction between the chlorine atom and a morpholine hydrogen atom.

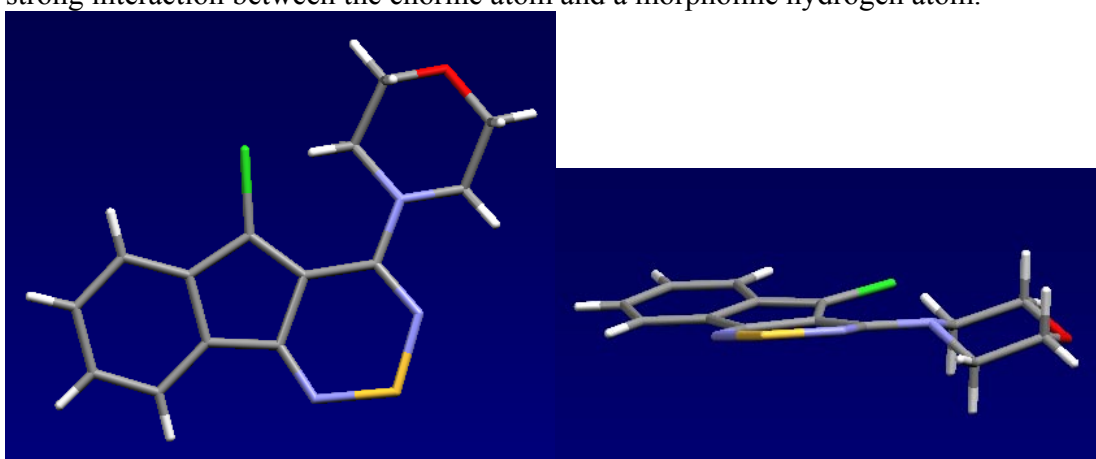

Two different views of the second maximum (dihedral angle 37.5 °) showing that the conjugation of the morpholine nitrogen lone pair and the thiadiazine ring is hindered by a strong interaction between the chlorine atom and a morpholine hydrogen atom.

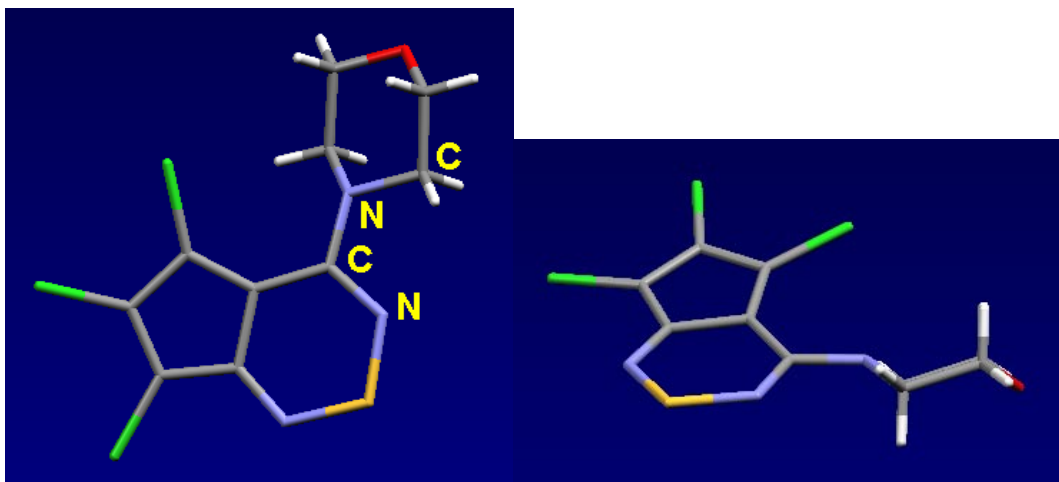

Two different views of the X-ray diffraction structure of compound **8** showing the relative position of the morpholine ring with respect to the thiadiazine ring.

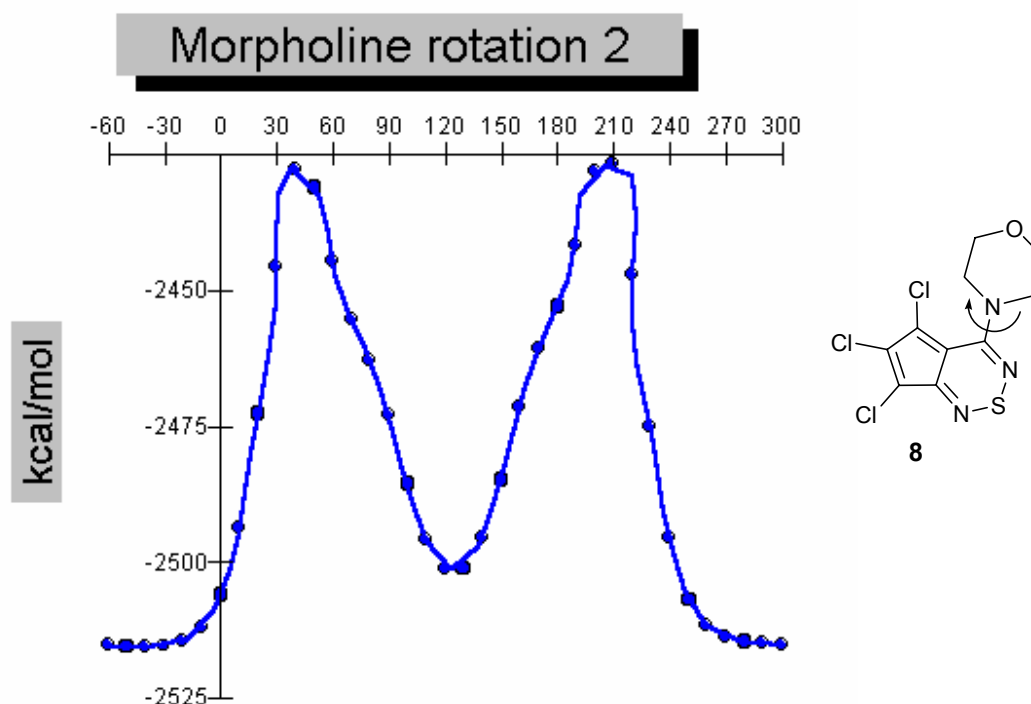

Plot of relative energies corresponding to rotation of the morpholine ring with respect to the thiadiazine ring. The two maxima correspond to dihedral angles of roughly 210 and 37.5 ° of the N(thiadiazine)-C-N(morpholine)-C dihedral angle as indicated in the first figure.

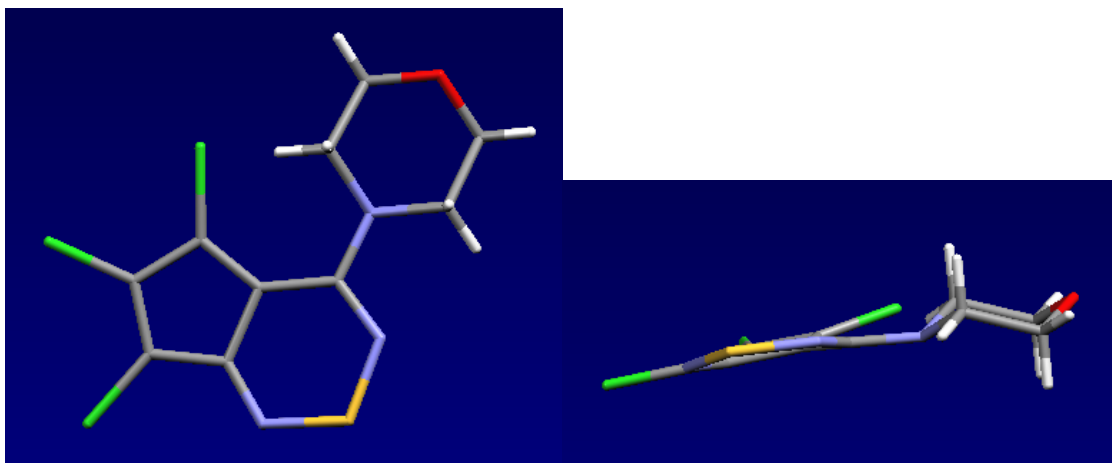

Two different views of the first maximum (dihedral angle 210 °) showing that the conjugation of the morpholine nitrogen lone pair and the thiadiazine ring is hindered by a strong interaction between the chlorine atom and a morpholine hydrogen atom.

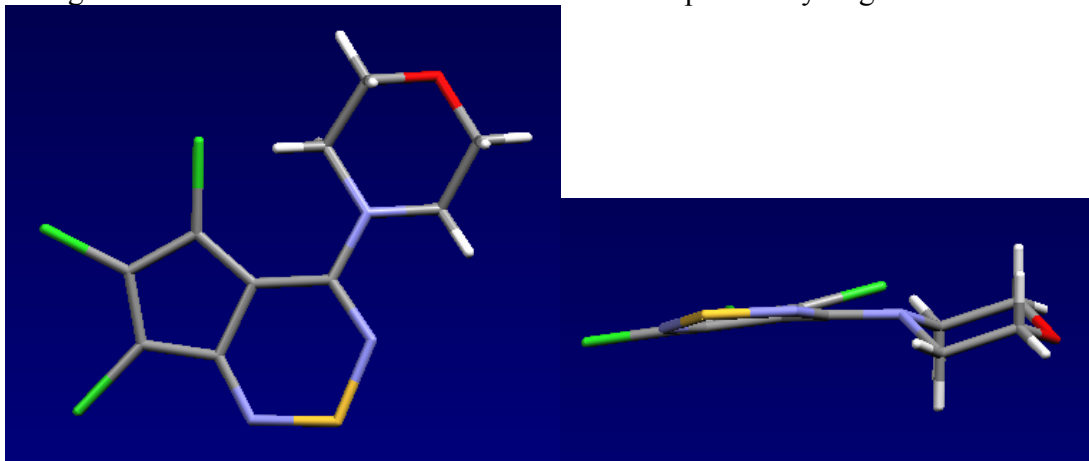

Two different views of the second maximum (dihedral angle 37.5 °) showing that the conjugation of the morpholine nitrogen lone pair and the thiadiazine ring is hindered by a strong interaction between the chlorine atom and a morpholine hydrogen atom.
